# Supplementary material for: Combining vancomycin-modified gold nanorod arrays and colloidal nanoparticles as a sandwich model for the discrimination of Gram-positive bacteria and their detection via surface-enhanced Raman spectroscopy (SERS)
Source: Royal Society of Chemistry journal article supplement (doi:10.1039/d1an00321f), 2021-01-01
Supplement: d1an00321f1.pdf [file d1an00321f1.pdf]

## SUPPLEMENTARY INFORMATION

### Combining vancomycin-modified gold nanorod arrays and colloidal nanoparticles as the sandwich model for discrimination of gram-positive bacteria and their detection via surface-enhanced Raman spectroscopy (SERS)

Araz Norouz Dizaji<sup>a,b</sup>, Nihal Simsek Ozek<sup>a,c</sup>, Ferhunde Aysin<sup>a,c</sup>, Ayfer Calis<sup>d</sup>, Asli Yilmaz<sup>a,e</sup>, Mehmet Yilmaz<sup>a,b,f\*</sup>

<sup>a</sup>East Anatolia High Technology Application and Research Center (DAYTAM), Ataturk University, 25240 Erzurum, Turkey

<sup>b</sup>Department of Chemical Engineering, Ataturk University, 25240 Erzurum, Turkey

<sup>c</sup>Department of Biology, Ataturk University, 25240 Erzurum, Turkey

<sup>d</sup>Department of Genetics and Bioengineering, Giresun University, 28200 Giresun, Turkey

<sup>e</sup>Department of Molecular Biology and Genetics, Ataturk University, 25240 Erzurum, Turkey

<sup>f</sup>Department of Nanoscience and Nanoengineering, Ataturk University, 25240 Erzurum, Turkey

\*Correspondence: MY, [nano.yilmaz@gmail.com](mailto:nano.yilmaz@gmail.com)

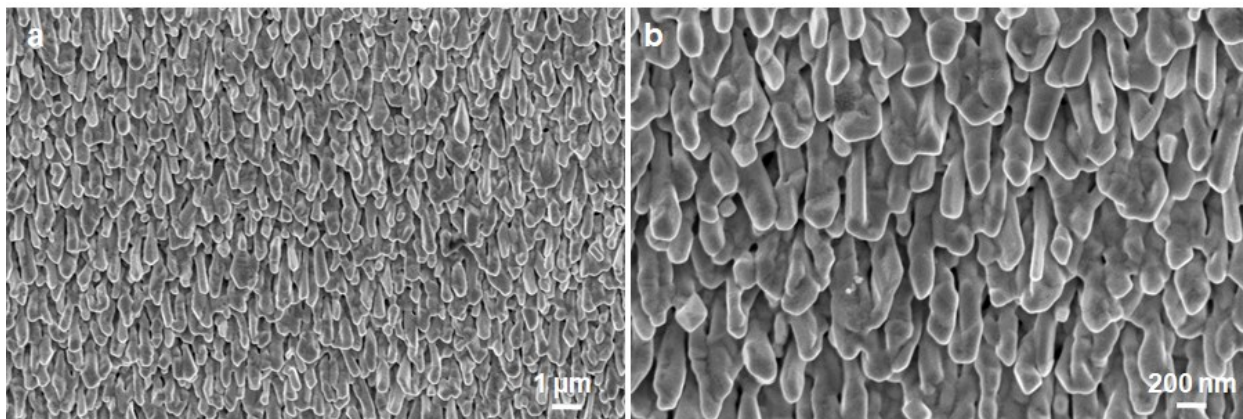

**Figure S1.** Representative SEM images of GNA platforms at different magnifications.

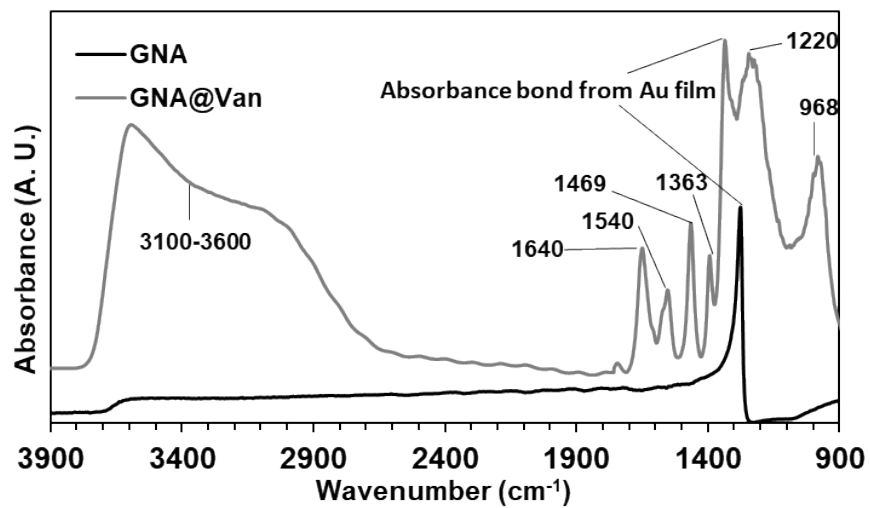

**Figure S2.** FT-IR spectra of GNA and GNA@Van substrates.

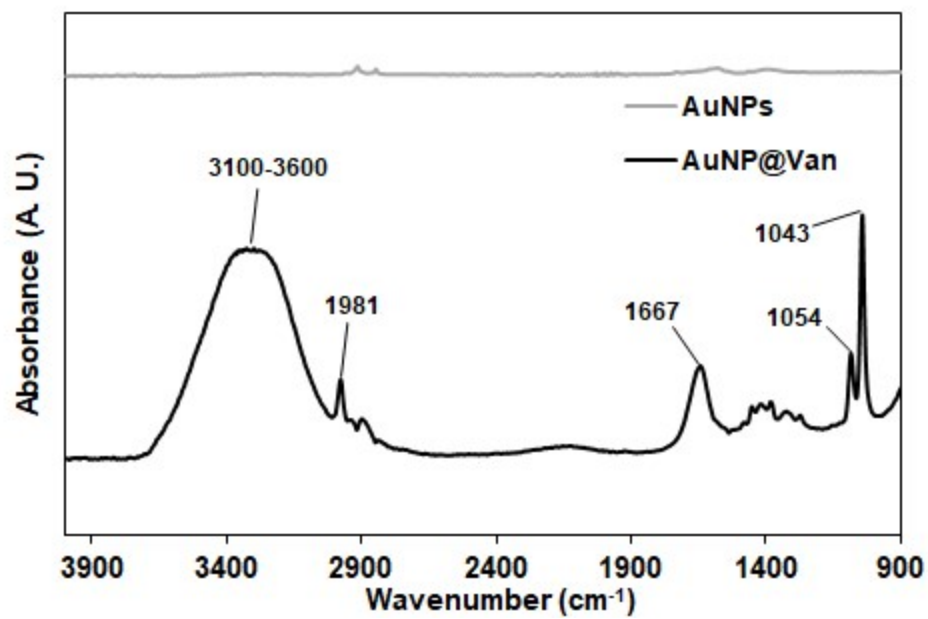

**Figure S3.** FTIR spectra of synthesized AuNPs and AuNP@Van.

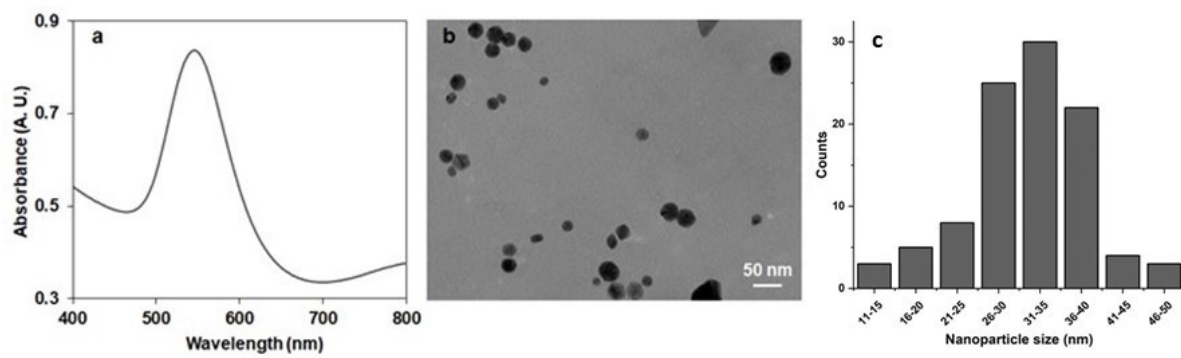

**Figure S4** UV-vis absorption spectra (a), TEM image (b), and size histograms (c) of AuNP@Van NP systems.

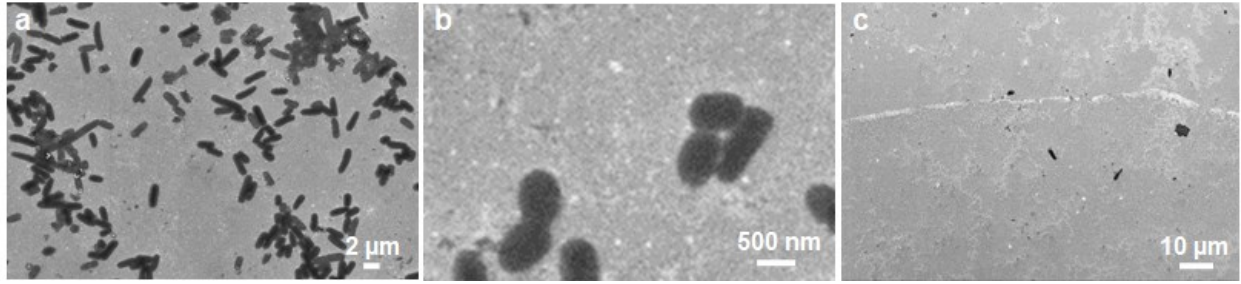

**Figure S5.** Representative SEM images of a) *B. Subtilis*, b) *S. aureus* and c) *E. coli* bacteria on SGS@Van substrate.

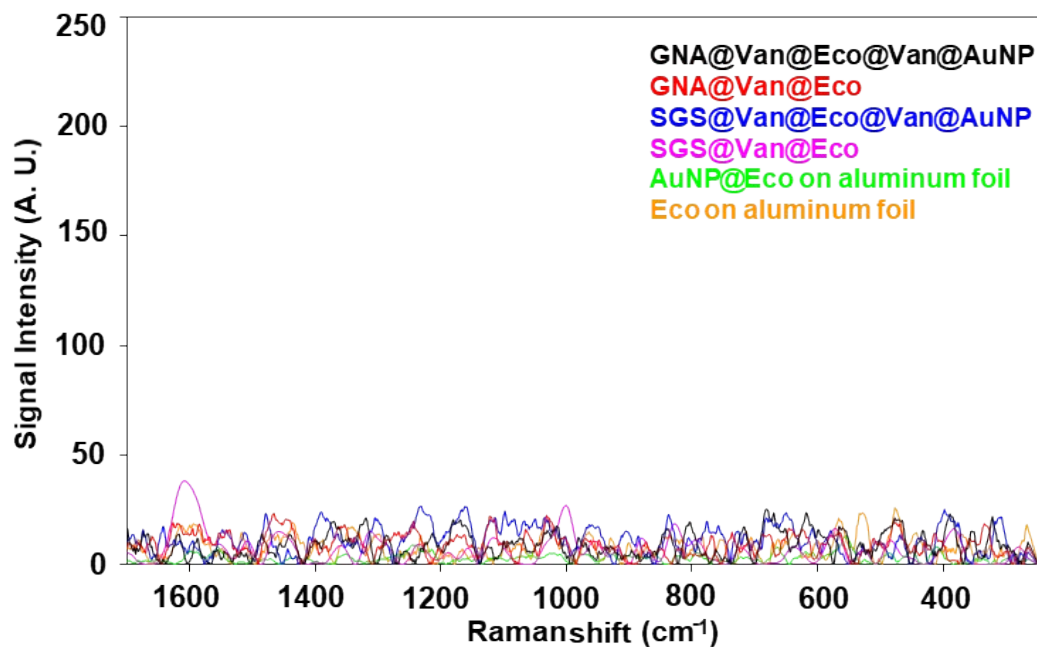

**Figure S6.** The averaged SERS spectra of *E. coli*, collected from the bacteria and AuNP@Bct on aluminium foil and the SGS@Van@Bct, SGS@Van@Bct@Van@AuNP, GNA@Van@Bct and GNA@Van@Bct@Van@AuNP samples.

**Table S1.** Band assignments of GNA@Van and AuNP@Van substrates.

| <b>Wavenumber (cm<sup>-1</sup>)</b> | <b>Chemical bound</b>                    | <b>References</b> |
|-------------------------------------|------------------------------------------|-------------------|
| 3400                                | hydroxyl stretching                      | [1]               |
| 2981                                | symmetry stretching of CH <sub>2</sub>   | [2]               |
| 1643                                | C=O stretching                           | [3]               |
| 1667                                | Amid I                                   | [4]               |
| 1540                                | N-H bending                              | [5]               |
| 1504                                | C-H bending vibration from phenyl ring   | [6]               |
| 1469-1480                           | CH-CH <sub>3</sub> asymmetric scissoring | [7]               |
| 1363                                | CH-CH <sub>3</sub>                       | [8]               |
| 1220-1230                           | C-O                                      | [9]               |
| 968                                 | C-O stretching                           | [10]              |

**Table S2.** Bacterial capturing abilities of GNA@Van substrates.

| <b>Bacteria</b>    | <b>Count/1000 <math>\mu\text{m}^2</math></b> |
|--------------------|----------------------------------------------|
| <i>B. subtilis</i> | 76 $\pm$ 5                                   |
| <i>S. aureus</i>   | 59 $\pm$ 7                                   |
| <i>E. coli</i>     | 2 $\pm$ 1                                    |

## References

- [1] Soria, J. A., & McDonald, A. G. (2012). Liquefaction of softwoods and hardwoods in supercritical methanol: a novel approach to bio-oil production. In Biomass Conversion (pp. 421-433). Springer, Berlin, Heidelberg.
- [2] Miculescu, F., Maidaniuc, A., Miculescu, M., Dan Batalu, N., Cătălin Ciocoiu, R., Voicu, S. I., ... & Thakur, V. K. (2018). Synthesis and characterization of jellified composites from bovine bone-derived hydroxyapatite and starch as precursors for robocasting. ACS omega, 3(1), 1338-1349.
- [3] Xi, X., Pizzi, A., & Delmotte, L. (2018). Isocyanate-free polyurethane coatings and adhesives from mono-and di-saccharides. Polymers, 10(4), 402.
- [4] Anwar Alebrahim, M., Krafft, C., Sekhaneh, W., Sigusch, B., & Popp, J. (2014). ATR-FTIR and Raman spectroscopy of primary and permanent teeth. Biomedical Spectroscopy and Imaging, 3(1), 15-27.
- [5] Mukherjee, M., Kumar, S., Bose, S., Das, C. K., & Kharitonov, A. P. (2008). Study on the mechanical, rheological, and morphological properties of short Kevlar™ fiber/s-PS composites. Polymer-Plastics Technology and Engineering, 47(6), 623-629.
- [6] Kumar, J. K., & Prasad, A. D. (2011). Identification and comparison of biomolecules in medicinal plants of Tephrosia tinctoria and Atylosia albicans by using FTIR. Rom. J. Biophys, 21(1), 63-71.
- [7] Bright, A., Devi, T. R., & Gunasekaran, S. (2010). Spectroscopical vibrational band assignment and qualitative analysis of biomedical compounds with cardiovascular activity. Int J Chem Tech Res, 2(1), 379-388.
- [8] Yuniarto, K., Purwanto, Y. A., Purwanto, S., Welt, B. A., Purwadaria, H. K., & Sunarti, T. C. (2016, April). Infrared and Raman studies on polylactide acid and polyethylene glycol-400 blend. In AIP Conference Proceedings (Vol. 1725, No. 1, p. 020101). AIP Publishing LLC.
- [9] Müller, M. (2019). The Anomalous Influence of Polyelectrolyte Concentration on the Deposition and Nanostructure of Poly (ethyleneimine)/Poly (acrylic acid) Multilayers. Molecules, 24(11), 2141.
- [10] Dave, H., Ledwani, L., Chandwani, N., Kikani, P., Desai, B., & Nema, S. K. (2013). Surface modification of polyester fabric by non-thermal plasma treatment and its effect on coloration using natural dye. Journal of Polymer Materials, 30(3), 291-304.
